# Supplementary material for: Unconscious goal pursuit strengthens voluntary force during sustained maximal effort via enhanced motor system state
Source: Research Square preprint supplement (doi:10.21203/rs.3.rs-2313745/v1), 2022-12-05
Supplement: Supplementary file 1 [file b94f7b9ab4f99d59b89e622a.xlsx]

## Sheet: (Phase_5) (bEMGあり) Group_Order
Table. 1 Maximal voluntary force, Silent period, MEP amplitude, bEMG and pupil area for the two tasks.
			Maximal voluntary force (N)			Silent period (ms)			MEP amplitude (mV)			bEMG (mV･ms)			Pupil area (dot)
	Pre-sustained MVC		286.9± 87.8			145.3± 9.38			1.00± 0.01			10.2 ± 1.52
	Sustained MVC
	Control		78.0± 6.56			200.8± 12.5			1.05± 0.01			13.3± 0.89			2118.2± 93.0
	Priming		77.3± 5.66			181.1± 12.2			1.05± 0.02			12.9± 1.15			2184.6± 158.6
	Priming + Reward		94.5± 7.47			174.8± 12.3			0.98± 0.01			13.6± 0.99			2194.7± 197.8
Abbreviations: MEP, motor evoked potential; MVC, maximal volutanry contration; and bEMG, background electromyography.

## Sheet: (Phase_5) (bEMGあり) (shout順別)
Table. 1 Maximal voluntary force, Silent period, MEP amplitude, bEMG and pupil area for the four conditions
			Maximal voluntary force (N)			Silent period (ms)			MEP amplitude (mV)			bEMG (μV･s)			Pupil area (dot)
	Pre-MVC		282.2± 18.5			157.9± 10.5			1.12± 0.10			13.5 ± 1.41			2807.0 ± 159.2
	Sustained MVCs
	Set1 no-shout		261.9± 23.3			155.1± 16.2			1.80± 0.19			10.5± 0.85			2696.9± 204.3
	shout		240.7± 17.0			152.5± 19.9			1.58± 0.17			10.9± 1.18			2526.2± 141.0
	Set 2 no-shout		155.3± 16.1			209.2± 15.6			1.92± 0.20			9.33± 2.09			2502.3± 199.1
	shout		162.6± 17.0			163.3± 25.9			1.68± 0.30			9.35± 2.46			2415.8± 203.2
Shout (later)	Set 3 no-shout		128.1± 14.0			191.7± 26.0			1.70± 0.27			7.97± 2.58			2542.3± 196.9
	shout		139.4± 12.2			181.0± 32.7			1.51± 0.23			9.34± 2.60			2227.2± 145.6
	Set 4 no-shout		106.9± 8.1			265.9± 71.6			1.78± 0.22			9.51±2.93			2561.4±166.1
	shout		123.0± 12.3			165.1± 32.0			1.59± 0.30			11.4± 1.87			2398.2± 159.8
	Set 5 no-shout		93.9± 7.4			180.4± 16.5			1.76± 0.27			6.20± 1.78			2655.0± 185.0
	shout		106.0± 10.5			165.3± 21.3			1.62± 0.22			7.83± 1.64			2148.2± 199.3
	Post-MVC		200.7± 19.6			151.7± 12.0			1.13± 0.09			12.0 ± 1.46			2748.6 ± 138.6
	Pre-MVC		298.7± 17.5			178.9± 18.5			0.72± 0.10			9.73 ± 2.07			2401.0 ± 171.4
	Sustained MVCs
	Set1 no-shout		217.5± 23.9			257.1± 65.5			1.05± 0.13			8.21± 1.00			2315.0± 177.4
	shout		301.0± 30.6			165.0± 20.6			0.92± 0.24			10.54± 1.76			2521.8± 173.1
	Set 2 no-shout		158.3± 14.3			222.7± 40.0			1.16± 0.14			5.39± 1.47			2349.9± 171.4
	shout		207.4± 27.5			170.8± 20.7			1.13± 0.12			7.83± 1.48			2327.5± 122.6
Shout (first)	Set 3 no-shout		120.3± 11.9			180.2± 21.9			0.97± 0.20			3.78± 0.88			2241.0± 166.1
	shout		185.3± 25.8			163.7± 17.8			1.12± 0.16			7.71± 2.35			2487.9± 152.1
	Set 4 no-shout		102.7± 7.05			176.2± 26.1			0.98± 0.097			2.61±0.50			2178.8±151.3
	shout		159.5± 19.8			188.3± 16.6			0.93± 0.082			6.96± 1.67			2375.8± 207.0
	Set 5 no-shout		87.6± 5.7			229.0± 23.8			1.02± 0.080			3.50± 0.57			2286.3± 236.6
	shout		126.0± 15.5			163.7± 20.3			1.15± 0.16			4.77± 1.44			2360.2± 218.2
	Post-MVC		199.3± 15.5			162.4± 18.1			0.91± 0.10			7.65±0.80			2333.7 ± 198.4

## Sheet: (Phase_5) (bEMGあり)
Table. 1 Maximal voluntary force, Silent period, MEP amplitude, bEMG and pupil area for the four conditions
		Maximal voluntary force (N)			Silent period (ms)			MEP amplitude (mV)			bEMG (μV･s)			Pupil area (dot)
Pre-MVC		290.5± 12.5			168.4± 10.6			0.92± 0.87			11.64 ± 1.31			2604.0 ± 124.6
Sustained MVCs
Set1 no-shout		239.7± 17.6			206.1± 35.1			1.43± 0.15			9.39± 0.70			2505.9± 139.7
shout		270.8± 18.6			158.8± 13.9			1.25± 0.16			10.72± 1.03			2524.0± 107.8
Set 2 no-shout		156.8± 10.8			215.9± 20.8			1.54± 0.15			7.36± 1.34			2426.1± 128.4
shout		185.0± 16.6			167.0± 16.0			1.41± 0.17			8.59± 1.40			2371.7± 115.2
Set 3 no-shout		124.2± 9.0			185.9± 16.5			1.34± 0.18			5.88± 1.43			2391.6± 130.4
shout		162.4± 15.0			172.4± 18.1			1.31± 0.14			8.53± 1.70			2357.6± 107.1
Set 4 no-shout		104.8± 4.7			221.1± 38.6			1.38± 0.15			6.06±1.69			2370.1±119.2
shout		141.3± 12.2			176.7± 17.7			1.26± 0.17			9.18± 1.34			2387.0± 126.3
Set 5 no-shout		90.7± 4.6			204.7± 17.3			1.39± 0.16			4.85± 0.97			2470.7± 152.7
shout		116.0± 9.4			164.5± 14.2			1.38± 0.14			6.30± 1.13			2254.2± 145.3
Post-MVC		200.0± 12.0			157.0± 10.6			1.02± 0.71			9.98±0.98			2541.1 ± 128.6
Data are presented as mean ± standard error of mean.

## Sheet: (Phase_5) (Soundあり)
Table. 1 MVC, Silent period, MEP amplitude and pupil area for the four conditions
		MVC (N)			Silent period (ms)			MEP amplitude (mV）			Pupil area (dot)			Sound level (dBA)					MEP amplitude (μV）
Baseline MVCs		290.5± 12.5			168.4± 10.6			0.92± 0.87			2604.0 ± 124.6								923.0± 87.6
Sustained MVCs
phase 1 no-shout		239.7± 17.6			206.1± 35.1			1.43± 0.15			2505.9± 139.7								1432.2± 151.6
shout		270.8± 18.6			158.8± 13.9			1.25± 0.16			2524.0± 107.8			2524.0± 107.8					1253.9± 168.3
phase 2 no-shout		156.8± 10.8			215.9± 20.8			1.54± 0.15			2426.1± 128.4								1544.8± 157.2
shout		185.0± 16.6			167.0± 16.0			1.41± 0.17			2371.7± 115.2			2371.7± 115.2					1411.0± 174.5
phase 3 no-shout		124.2± 9.0			185.9± 16.5			1.34± 0.18			2391.6± 130.4								1341.2± 189.0
shout		162.4± 15.0			172.4± 18.1			1.31± 0.14			2357.6± 107.1			2357.6± 107.1					1316.1± 146.8
phase 4 no-shout		104.8± 4.7			221.1± 38.6			1.38± 0.15			2370.1±119.2								1388.2± 157.9
shout		141.3± 12.2			176.7± 17.7			1.26± 0.17			2387.0± 126.3			2387.0± 126.3					1265.6± 173.3
phase 5 no-shout		90.7± 4.6			204.7± 17.3			1.39± 0.16			2470.7± 152.7								1391.5± 168.1
shout		116.0± 9.4			164.5± 14.2			1.38± 0.14			2254.2± 145.3			2254.2± 145.3					1389.8± 148.0
Recovery MVCs		200.0± 12.0			157.0± 10.6			1.02± 0.71			2541.1 ± 128.6								1026.3± 71.9
Data are presented as mean ± standard error of mean.

## Sheet: (Phase_5)
Table. 1 MVC, Silent period, MEP amplitude and pupil area for the four conditions
		MVC (N)			Silent period (ms)			MEP amplitude (mV）			Pupil area (dot)
Baseline MVCs		290.5± 12.5			168.4± 10.6			0.92± 0.87			2604.0 ± 124.6
Sustained MVCs
phase 1 no-shout		239.7± 17.6			206.1± 35.1			1.43± 0.15			2505.9± 139.7
shout		270.8± 18.6			158.8± 13.9			1.25± 0.16			2524.0± 107.8
phase 2 no-shout		156.8± 10.8			215.9± 20.8			1.54± 0.15			2426.1± 128.4
shout		185.0± 16.6			167.0± 16.0			1.41± 0.17			2371.7± 115.2
phase 3 no-shout		124.2± 9.0			185.9± 16.5			1.34± 0.18			2391.6± 130.4
shout		162.4± 15.0			172.4± 18.1			1.31± 0.14			2357.6± 107.1
phase 4 no-shout		104.8± 4.7			221.1± 38.6			1.38± 0.15			2370.1±119.2
shout		141.3± 12.2			176.7± 17.7			1.26± 0.17			2387.0± 126.3
phase 5 no-shout		90.7± 4.6			204.7± 17.3			1.39± 0.16			2470.7± 152.7
shout		116.0± 9.4			164.5± 14.2			1.38± 0.14			2254.2± 145.3
Recovery MVCs		200.0± 12.0			157.0± 10.6			1.02± 0.71			2541.1 ± 128.6
Data are presented as mean ± standard error of mean.

## Sheet: Sheet1
Table. 1 MVC, Silent period, MEP amplitude and pupil area for the four conditions
		MVC (N)			Silent period (ms)			MEP amplitude (μV）			Pupil area (dot)
Baseline MVCs		290.5± 12.5			168.4± 10.6			923.0± 87.6			2604.0 ± 124.6
Sustained MVCs		127.0± 8.0			212.5± 21.7			1120.1± 88.5			2401.1 ± 120.6
Sustained MVCs with shout		165.5± 13.9*			165.0± 15.5*			1000.4± 101.3			2342.3 ± 113.7*
Recovery MVCs		200.0± 12.0			157.0± 10.6			1026.3± 71.9			2541.1 ± 128.6
Data are presented as mean ± standard error of mean.
*p < 0.05, vs. Sustained MVCs condition.
